# Supplementary material for: Highly oriented BaTiO3 film self-assembled using an interfacial strategy and its application as a flexible piezoelectric generator for wind energy harvesting
Source: Royal Society of Chemistry journal article supplement (doi:10.1039/c5ta01079a), 2015-01-01
Supplement: c5ta01079a1.pdf [file c5ta01079a1.pdf]

## Electronic Supplementary Information

### Highly Oriented BaTiO<sub>3</sub> Film Self-assembled by an Interfacial Strategy and Its Application on Flexible Piezoelectric Generator for Wind Energy Harvesting

Tao Gao<sup>a</sup>, Jianjun. Liao<sup>a</sup>, Jianshu Wang<sup>a</sup>, Yingqiang Qiu<sup>a</sup>, Quan Yang<sup>a</sup>, Min Zhang<sup>a</sup>, Yang Zhao<sup>c</sup>, Lifeng Qin<sup>c</sup>, Hao Xue<sup>\*a, b</sup>, Zhaoxian Xiong<sup>a, b</sup>, Lifu Chen<sup>a</sup> and Qing-ming Wang<sup>\*d</sup>

<sup>a</sup> Department of Materials Science and Engineering  
College of Materials, Xiamen University

Xiamen 361005, China. E-mail: [xuehao@xmu.edu.cn](mailto:xuehao@xmu.edu.cn)

<sup>b</sup> Key Laboratory of Electronic Ceramic Materials and Components (Xiamen University),  
Xiamen City, 361005, China.

<sup>c</sup> Department of Mechanical and Electrical Engineering, Xiamen University, Xiamen  
361005, China.

<sup>d</sup> Department of Mechanical Engineering and Materials Science  
University of Pittsburgh, Pittsburgh, PA, 15213, USA. E-mail: [qiw4@pitt.edu](mailto:qiw4@pitt.edu).

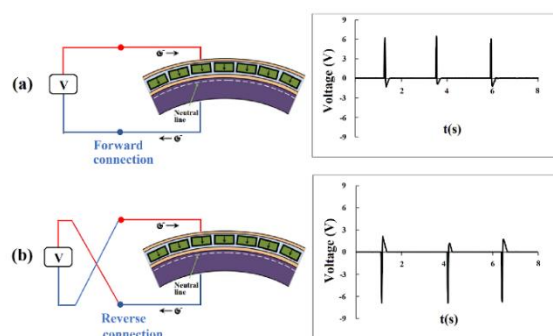

Figure S1. Switching evaluation of open-circuit voltage from PG in the forward (a) and reverse (b) connections, indicating that the output signals are based on piezoelectric response.

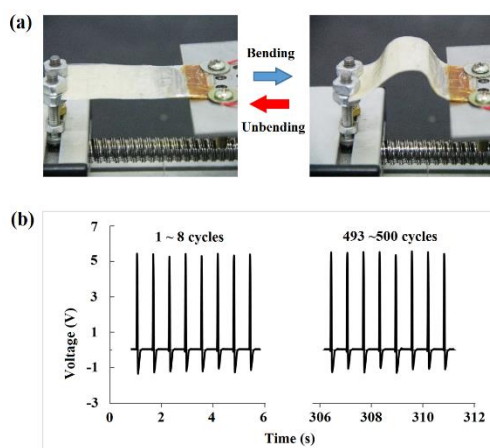

Figure S2. (a) Optical images of PG device in its bending and release states, the PG device is well packaged and

fixed on the stage which is driven by linear motor. (b) The durability test results of the PG device.

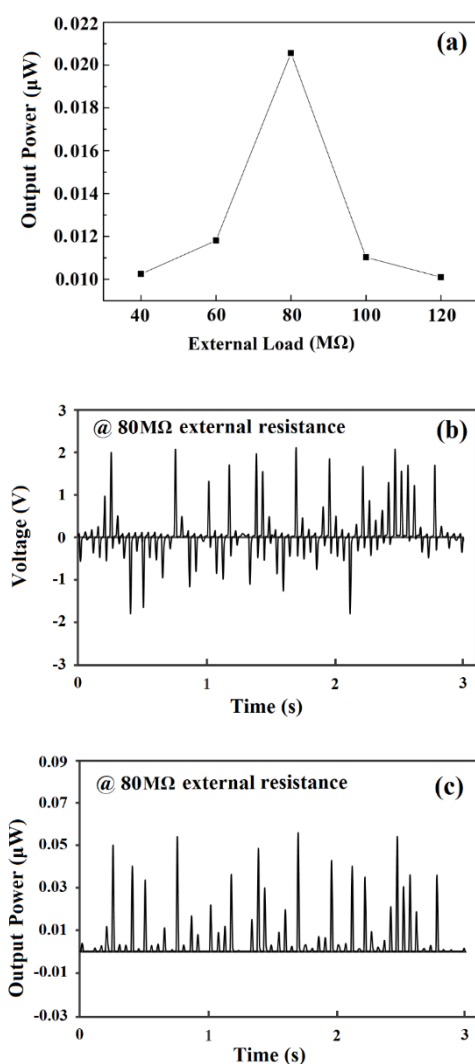

Figure S3. (a) The power delivered to the external load resistors versus the load resistance. (b) and (c) The instantaneous voltage and power at 80 M $\Omega$  external resistance, respectively.

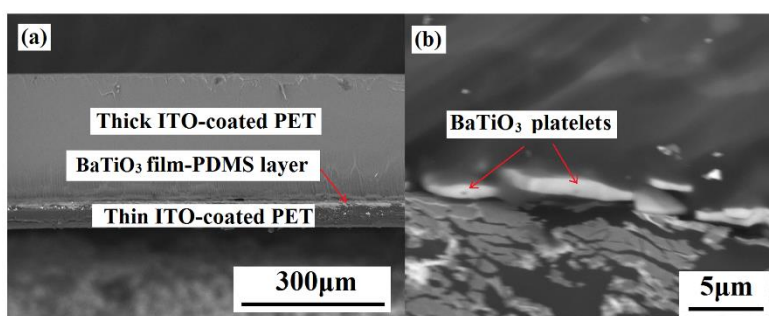

Figure S4. (a) Cross sectional SEM image of the self-assembled BaTiO<sub>3</sub> film based PG device. (b) A magnified cross-sectional SEM image of the PG device.
